# Supplementary material for: Aqueous biphasic systems composed of ionic liquids and polypropylene glycol: insights into their liquid–liquid demixing mechanisms
Source: Royal Society of Chemistry journal article supplement (doi:10.1039/c6cp04023c), 2016-01-01
Supplement: c6cp04023c1.pdf [file c6cp04023c1.pdf]

## Electronic Supplementary Information

# Aqueous biphasic systems composed of ionic liquids and polypropylene glycol: insights into their liquid-liquid demixing mechanisms

*Catarina M. S. S. Neves,<sup>at</sup> Shahla Shahriari,<sup>a,b†</sup> Jesus Lemus,<sup>a</sup> Jorge F. B. Pereira,<sup>c</sup> Mara G. Freire<sup>a</sup> and João A. P. Coutinho<sup>a\*</sup>*

<sup>a</sup>CICECO – Aveiro Institute of Materials, Department of Chemistry, University of Aveiro, 3810-193 Aveiro, Portugal.

<sup>b</sup>Department of Chemical Engineering Shahr-e-Qods Branch, Islamic Azad University, Tehran, Iran.

<sup>c</sup>Department of Bioprocess and Biotechnology, School of Pharmaceutical Sciences, UNESP – Univ Estadual Paulista, Rodovia Araraquara-Jaú/Km 01, Campos Ville, 14800-903 Araraquara, SP, Brazil

\*Corresponding author

Tel: +351 234370200; Fax: +351 234370084

E-mail address: [jcoutinho@ua.pt](mailto:jcoutinho@ua.pt)

<sup>†</sup>Equally contributing authors.

**Table S1.** Weight fraction data for the ternary system composed of [C<sub>4</sub>mim]Cl (1) + PPG-400 (2) + H<sub>2</sub>O (3) at 298 K.

| <b>100 w<sub>1</sub></b> | <b>100 w<sub>2</sub></b> | <b>100 w<sub>1</sub></b> | <b>100 w<sub>2</sub></b> | <b>100 w<sub>1</sub></b> | <b>100 w<sub>2</sub></b> |
|--------------------------|--------------------------|--------------------------|--------------------------|--------------------------|--------------------------|
| 11.3778                  | 77.7692                  | 21.2392                  | 41.5739                  | 30.0207                  | 23.1347                  |
| 13.3799                  | 70.5122                  | 21.5309                  | 40.5979                  | 30.7554                  | 22.3336                  |
| 13.7667                  | 67.8707                  | 21.8751                  | 39.8504                  | 31.4175                  | 21.4282                  |
| 14.7352                  | 65.7314                  | 22.2274                  | 39.0245                  | 32.2777                  | 20.4566                  |
| 15.4492                  | 63.3331                  | 22.4849                  | 38.3382                  | 33.1197                  | 19.5844                  |
| 16.2839                  | 61.2721                  | 22.9725                  | 36.8470                  | 34.1328                  | 18.7045                  |
| 16.8180                  | 59.4339                  | 23.2252                  | 35.3724                  | 35.0239                  | 17.8932                  |
| 17.2060                  | 57.5461                  | 23.6140                  | 34.8276                  | 35.8667                  | 17.1062                  |
| 17.5789                  | 55.6112                  | 24.1426                  | 33.6920                  | 36.7413                  | 16.4489                  |
| 17.9955                  | 53.9902                  | 24.4161                  | 32.5081                  | 37.8278                  | 15.5650                  |
| 18.3506                  | 52.5003                  | 25.1911                  | 31.3485                  | 38.6015                  | 14.6549                  |
| 18.8173                  | 51.0361                  | 25.5959                  | 30.3554                  | 39.5773                  | 14.0254                  |
| 18.8989                  | 49.8741                  | 25.9137                  | 29.4186                  | 40.5676                  | 13.2354                  |
| 19.4273                  | 48.5716                  | 26.4941                  | 28.4275                  | 41.7724                  | 12.4376                  |
| 19.9060                  | 47.4142                  | 27.2014                  | 27.4571                  | 43.3640                  | 11.5613                  |
| 20.2743                  | 46.4215                  | 27.7250                  | 26.6197                  | 45.1789                  | 10.5954                  |
| 20.4158                  | 44.8474                  | 28.1217                  | 25.7859                  | 46.7871                  | 9.7386                   |
| 20.7214                  | 43.8062                  | 28.7222                  | 25.0000                  |                          |                          |
| 21.1589                  | 42.7921                  | 29.5159                  | 24.1180                  |                          |                          |

**Table S2.** Weight fraction data for the ternary system composed of [C<sub>4</sub>mim]Br (1) + PPG-400 (2) + H<sub>2</sub>O (3) at 298 K.

| <b>100 w<sub>1</sub></b> | <b>100 w<sub>2</sub></b> | <b>100 w<sub>1</sub></b> | <b>100 w<sub>2</sub></b> |
|--------------------------|--------------------------|--------------------------|--------------------------|
| 44.6389                  | 38.7330                  | 50.8547                  | 27.9925                  |
| 45.3688                  | 37.2977                  | 51.7266                  | 26.6667                  |
| 46.2459                  | 35.6931                  | 52.7120                  | 25.3312                  |
| 47.0449                  | 34.2687                  | 53.8105                  | 23.6839                  |
| 47.5733                  | 33.3205                  | 54.8512                  | 22.4377                  |
| 48.3238                  | 32.0064                  | 55.9744                  | 21.1525                  |
| 49.1741                  | 30.5804                  | 57.9724                  | 18.8555                  |
| 49.8944                  | 29.3599                  | 60.6505                  | 16.2198                  |

**Table S3.** Weight fraction data for the ternary system composed of [C<sub>4</sub>mim][CH<sub>3</sub>CO<sub>2</sub>] (1) + PPG-400 (2) + H<sub>2</sub>O (3) at 298 K.

| <b>100 w<sub>1</sub></b> | <b>100 w<sub>2</sub></b> | <b>100 w<sub>1</sub></b> | <b>100 w<sub>2</sub></b> | <b>100 w<sub>1</sub></b> | <b>100 w<sub>2</sub></b> |
|--------------------------|--------------------------|--------------------------|--------------------------|--------------------------|--------------------------|
| 6.3384                   | 76.5586                  | 14.5439                  | 43.4994                  | 25.2643                  | 20.7338                  |
| 7.2369                   | 71.2274                  | 14.9050                  | 42.2438                  | 25.9194                  | 19.9175                  |
| 7.8568                   | 68.5571                  | 15.1877                  | 41.1022                  | 26.7152                  | 19.1814                  |
| 8.7020                   | 65.6834                  | 15.5014                  | 40.1484                  | 27.2733                  | 18.6724                  |
| 9.4700                   | 63.0880                  | 15.8638                  | 39.2097                  | 27.7917                  | 18.0921                  |
| 10.0212                  | 60.6780                  | 16.1015                  | 36.3097                  | 28.3628                  | 17.5193                  |
| 10.6133                  | 58.3684                  | 16.3154                  | 35.5050                  | 29.0070                  | 16.9879                  |
| 11.2064                  | 56.3302                  | 17.0030                  | 34.5393                  | 29.6159                  | 16.4441                  |
| 11.7436                  | 54.5732                  | 17.0775                  | 33.5254                  | 30.1347                  | 15.9265                  |
| 12.2747                  | 52.7037                  | 17.7353                  | 32.6047                  | 30.8244                  | 15.3771                  |
| 12.8804                  | 51.0111                  | 21.8148                  | 26.9760                  | 31.7780                  | 14.7948                  |
| 13.0559                  | 48.5956                  | 22.2073                  | 25.4883                  | 33.7944                  | 13.8589                  |
| 13.5117                  | 47.1960                  | 22.4303                  | 24.8099                  | 34.4047                  | 13.4102                  |
| 13.9173                  | 45.8974                  | 23.2998                  | 23.1970                  | 35.0071                  | 12.7958                  |
| 14.2504                  | 44.6298                  | 23.9262                  | 22.3697                  | 35.9113                  | 12.0804                  |
|                          |                          | 24.4446                  | 21.5937                  | 37.5273                  | 11.2540                  |

**Table S4.** Weight fraction data for the ternary system composed of [C<sub>4</sub>mim][CH<sub>3</sub>SO<sub>4</sub>] (1) + PPG-400 (2) + H<sub>2</sub>O (3) at 298 K.

| <b>100 w<sub>1</sub></b> | <b>100 w<sub>2</sub></b> | <b>100 w<sub>1</sub></b> | <b>100 w<sub>2</sub></b> | <b>100 w<sub>1</sub></b> | <b>100 w<sub>2</sub></b> |
|--------------------------|--------------------------|--------------------------|--------------------------|--------------------------|--------------------------|
| 29.5744                  | 60.5351                  | 41.1632                  | 38.6289                  | 48.2825                  | 29.1087                  |
| 33.5567                  | 51.8000                  | 41.9679                  | 38.2424                  | 49.6467                  | 27.4962                  |
| 35.5414                  | 48.7008                  | 42.4439                  | 36.7763                  | 51.1430                  | 25.9716                  |
| 37.1827                  | 45.8045                  | 43.0643                  | 36.3194                  | 51.8636                  | 24.9294                  |
| 38.4546                  | 43.4830                  | 44.5817                  | 34.2612                  | 53.7214                  | 22.8816                  |
| 39.2612                  | 41.8435                  | 45.6420                  | 32.6491                  | 55.3654                  | 21.5361                  |
| 40.5496                  | 39.7397                  | 46.8258                  | 30.8970                  | 57.8163                  | 19.3291                  |

**Table S5.** Weight fraction data for the ternary system composed of [C<sub>4</sub>mim][DMP] (1) + PPG-400 (2) + H<sub>2</sub>O (3) at 298 K.

| 100 $w_1$ | 100 $w_2$ | 100 $w_1$ | 100 $w_2$ | 100 $w_1$ | 100 $w_2$ |
|-----------|-----------|-----------|-----------|-----------|-----------|
| 10.2845   | 53.9655   | 16.2627   | 30.8294   | 25.0339   | 15.2395   |
| 11.1897   | 51.4337   | 16.6389   | 29.8365   | 25.9842   | 14.7703   |
| 12.2209   | 49.0403   | 17.1679   | 28.2670   | 26.7041   | 14.0447   |
| 12.8246   | 45.6668   | 17.2236   | 28.4871   | 27.2756   | 13.4256   |
| 12.9927   | 42.7625   | 19.8879   | 24.7167   | 27.7989   | 12.7640   |
| 13.5494   | 41.3147   | 20.1419   | 22.5531   | 28.6502   | 12.4029   |
| 14.2539   | 39.7814   | 20.1436   | 24.1568   | 29.7317   | 11.8288   |
| 14.5503   | 37.4066   | 20.1546   | 23.2696   | 31.1576   | 11.3927   |
| 15.2003   | 36.1390   | 21.0680   | 20.5721   | 31.4702   | 10.9483   |
| 15.4495   | 34.2713   | 21.9197   | 18.9082   | 31.9995   | 10.4934   |
| 15.5318   | 32.5398   | 23.1715   | 17.7588   | 32.6803   | 10.0654   |
| 15.8222   | 32.4511   | 24.0793   | 16.7404   | 33.1822   | 9.6921    |
| 15.9988   | 31.5143   | 24.5616   | 15.9877   | 34.1901   | 9.4067    |
|           |           | 24.7843   | 15.5965   | 34.7591   | 8.9183    |

**Table S6.** Weight fraction data for the ternary system composed of [C<sub>4</sub>mpy]Cl (1) + PPG-400 (2) + H<sub>2</sub>O (3) at 298 K.

| 100 $w_1$ | 100 $w_2$ | 100 $w_1$ | 100 $w_2$ | 100 $w_1$ | 100 $w_2$ |
|-----------|-----------|-----------|-----------|-----------|-----------|
| 8.3361    | 80.5151   | 20.3304   | 38.4495   | 26.7752   | 25.0421   |
| 9.6790    | 75.8518   | 20.4837   | 37.2419   | 27.1670   | 24.3563   |
| 10.7113   | 73.0357   | 20.8166   | 36.6431   | 27.6210   | 23.6779   |
| 11.3967   | 67.9622   | 20.8795   | 35.5502   | 28.4827   | 22.9043   |
| 12.9176   | 62.3540   | 21.2381   | 34.8255   | 29.1614   | 22.1584   |
| 16.2323   | 52.7660   | 21.9155   | 33.6736   | 29.7016   | 21.4460   |
| 16.8601   | 51.0985   | 21.9401   | 32.7958   | 30.3726   | 20.4638   |
| 17.2765   | 48.9214   | 22.5049   | 31.6769   | 31.4744   | 19.6657   |
| 17.8352   | 47.1245   | 23.0928   | 30.6805   | 32.3758   | 18.7996   |
| 18.4872   | 45.9710   | 23.4852   | 29.4331   | 33.5685   | 17.7282   |
| 18.8666   | 44.5181   | 24.2862   | 28.7877   | 34.2695   | 16.9739   |
| 19.2537   | 43.2797   | 24.8948   | 27.9013   | 36.1015   | 15.9749   |
| 19.5714   | 41.9003   | 25.4033   | 27.3371   | 38.1261   | 14.5939   |
| 19.8080   | 40.5444   | 25.8019   | 26.5405   |           |           |
| 20.2746   | 39.6859   | 26.3115   | 25.7465   |           |           |

**Table S7.** Weight fraction data for the ternary system composed of [C<sub>4</sub>mpip]Cl (1) + PPG-400 (2) + H<sub>2</sub>O (3) at 298 K.

| 100 $w_1$ | 100 $w_2$ | 100 $w_1$ | 100 $w_2$ | 100 $w_1$ | 100 $w_2$ |
|-----------|-----------|-----------|-----------|-----------|-----------|
| 7.1327    | 80.7814   | 17.2228   | 35.5630   | 27.1809   | 18.4966   |
| 7.8133    | 77.3869   | 17.5227   | 34.9480   | 27.7020   | 17.8081   |
| 8.7619    | 69.4773   | 17.6022   | 33.8397   | 28.3109   | 17.2113   |
| 9.5626    | 65.2542   | 17.8801   | 33.1884   | 28.8430   | 16.6025   |
| 10.4391   | 62.8660   | 18.6906   | 32.3447   | 29.5022   | 15.9745   |
| 10.9727   | 59.1915   | 19.2248   | 31.2822   | 30.2127   | 15.3828   |
| 11.6017   | 57.2454   | 19.7146   | 30.1258   | 31.0416   | 14.7605   |
| 12.3425   | 55.4610   | 20.1677   | 28.9183   | 31.6613   | 14.1104   |
| 12.9114   | 52.8771   | 20.5588   | 28.0123   | 32.5810   | 13.4162   |
| 13.3318   | 50.6838   | 21.0086   | 27.1704   | 33.2141   | 12.8727   |
| 13.8580   | 49.3372   | 21.4379   | 26.4088   | 33.8654   | 12.3129   |
| 14.1608   | 47.1122   | 21.8389   | 25.6328   | 34.5822   | 11.7636   |
| 14.4559   | 45.2803   | 22.6095   | 24.7636   | 35.3198   | 11.2275   |
| 15.0416   | 44.0412   | 22.9834   | 24.0924   | 36.2092   | 10.6338   |
| 15.3507   | 42.3981   | 23.5678   | 23.0956   | 36.9922   | 10.0786   |
| 15.7654   | 41.4478   | 24.0858   | 22.2106   | 37.7232   | 9.5369    |
| 15.9887   | 39.9196   | 24.4025   | 21.7033   | 38.6211   | 8.9840    |
| 16.3973   | 39.0641   | 25.1320   | 20.7880   | 39.7189   | 8.4544    |
| 16.6331   | 37.7627   | 25.7531   | 19.9629   |           |           |
| 16.9801   | 36.7602   | 26.5170   | 19.2641   |           |           |

**Table S8.** Weight fraction data for the ternary system composed of [C<sub>4</sub>mpyr]Cl (1) + PPG-400 (2) + H<sub>2</sub>O (3) at 298 K.

| 100 $w_1$ | 100 $w_2$ | 100 $w_1$ | 100 $w_2$ | 100 $w_1$ | 100 $w_2$ |
|-----------|-----------|-----------|-----------|-----------|-----------|
| 3.1158    | 83.7254   | 14.0782   | 34.3191   | 18.8831   | 24.4523   |
| 4.8749    | 77.2603   | 14.4547   | 33.4994   | 19.0012   | 23.9686   |
| 6.0854    | 71.8186   | 14.9201   | 32.8697   | 19.3942   | 23.3513   |
| 7.2443    | 66.7132   | 15.3446   | 32.0083   | 19.8196   | 22.6631   |
| 8.2681    | 62.4269   | 15.3779   | 30.9505   | 20.0206   | 22.2073   |
| 10.4306   | 52.5539   | 15.7124   | 30.2027   | 20.4171   | 21.7074   |
| 10.8795   | 49.7669   | 15.9733   | 29.5132   | 20.9195   | 21.2087   |
| 11.4194   | 47.4708   | 16.2814   | 28.8856   | 21.2460   | 20.5289   |
| 11.6710   | 45.0999   | 16.6530   | 28.1806   | 21.7376   | 20.0765   |
| 12.1742   | 42.8855   | 16.8738   | 27.5660   | 22.1562   | 19.6310   |
| 12.4949   | 41.0745   | 17.0961   | 26.9504   | 22.5621   | 19.1954   |
| 12.8015   | 39.7625   | 17.4167   | 26.5763   | 22.9652   | 18.7543   |
| 13.2366   | 38.3413   | 17.6750   | 25.9939   | 23.1372   | 18.2148   |
| 13.4838   | 36.8857   | 18.3811   | 25.3364   | 23.5122   | 17.8322   |
| 13.7685   | 35.7692   | 18.6541   | 25.0055   | 23.7995   | 17.4576   |

**Table S9.** Weight fraction data for the ternary system composed of [Ch]Cl (1) + PPG-400 (2) + H<sub>2</sub>O (3) at 298 K.

| <b>100 w<sub>1</sub></b> | <b>100 w<sub>2</sub></b> | <b>100 w<sub>1</sub></b> | <b>100 w<sub>2</sub></b> | <b>100 w<sub>1</sub></b> | <b>100 w<sub>2</sub></b> |
|--------------------------|--------------------------|--------------------------|--------------------------|--------------------------|--------------------------|
| 5.4050                   | 56.7531                  | 10.6186                  | 26.2245                  | 14.8972                  | 18.8858                  |
| 6.2832                   | 48.7073                  | 11.2173                  | 25.4599                  | 15.2441                  | 18.4645                  |
| 6.9546                   | 43.0658                  | 11.5553                  | 24.2382                  | 15.4338                  | 17.9548                  |
| 7.4608                   | 39.1209                  | 12.0105                  | 23.5710                  | 15.6118                  | 17.4677                  |
| 8.0541                   | 36.2790                  | 13.0054                  | 22.5246                  | 16.0146                  | 17.2173                  |
| 8.4440                   | 33.5576                  | 13.4615                  | 21.9520                  | 16.6792                  | 16.7918                  |
| 8.9212                   | 31.3208                  | 13.8085                  | 21.2097                  | 16.8786                  | 16.4596                  |
| 9.2445                   | 29.6235                  | 14.0182                  | 20.4964                  | 17.5472                  | 15.9752                  |
| 9.8371                   | 28.6032                  | 14.3353                  | 19.9674                  | 17.5268                  | 15.4786                  |
| 10.3631                  | 27.3409                  | 14.5712                  | 19.3311                  | 18.1863                  | 15.0861                  |
|                          |                          |                          |                          | 18.2163                  | 14.6644                  |

**Table S10.** Weight fraction data for the ternary system composed of [C<sub>3</sub>mim]Cl (1) + PPG-400 (2) + H<sub>2</sub>O (3) at 298 K.

| <b>100 w<sub>1</sub></b> | <b>100 w<sub>2</sub></b> | <b>100 w<sub>1</sub></b> | <b>100 w<sub>2</sub></b> | <b>100 w<sub>1</sub></b> | <b>100 w<sub>2</sub></b> |
|--------------------------|--------------------------|--------------------------|--------------------------|--------------------------|--------------------------|
| 2.7424                   | 75.3911                  | 7.5475                   | 45.8468                  | 12.5157                  | 28.2904                  |
| 3.1465                   | 71.9158                  | 8.1788                   | 44.0461                  | 14.6228                  | 23.9788                  |
| 3.6982                   | 68.6827                  | 8.5996                   | 41.6084                  | 15.8683                  | 22.3890                  |
| 4.1857                   | 65.5681                  | 9.2700                   | 39.2183                  | 16.2612                  | 21.3512                  |
| 4.6759                   | 62.6024                  | 9.7504                   | 37.2516                  | 17.2544                  | 20.0704                  |
| 5.4752                   | 59.8758                  | 10.0943                  | 35.5303                  | 18.1821                  | 18.9942                  |
| 6.2169                   | 55.1529                  | 10.3281                  | 34.1012                  | 19.0409                  | 17.9391                  |
| 6.9115                   | 51.4128                  | 11.0191                  | 32.8999                  | 20.2783                  | 16.8314                  |
| 7.4877                   | 48.3778                  | 11.2575                  | 30.7777                  | 21.5331                  | 15.7299                  |
|                          |                          | 11.9940                  | 29.1784                  | 22.1761                  | 14.9903                  |

**Table S11.** Weight fraction data for the ternary system composed of [C<sub>2</sub>mim]Cl (1) + PPG-400 (2) + H<sub>2</sub>O (3) at 298 K.

| <b>100 w<sub>1</sub></b> | <b>100 w<sub>2</sub></b> | <b>100 w<sub>1</sub></b> | <b>100 w<sub>2</sub></b> | <b>100 w<sub>1</sub></b> | <b>100 w<sub>2</sub></b> |
|--------------------------|--------------------------|--------------------------|--------------------------|--------------------------|--------------------------|
| 4.9640                   | 56.7208                  | 7.8055                   | 36.7663                  | 10.1254                  | 28.0461                  |
| 5.8163                   | 49.9894                  | 8.4410                   | 34.6777                  | 10.3408                  | 26.5413                  |
| 6.6284                   | 45.0010                  | 8.9342                   | 32.4251                  | 12.0158                  | 25.2372                  |
| 7.3904                   | 39.6629                  | 9.3193                   | 30.3243                  | 12.4848                  | 24.4594                  |
|                          |                          | 9.5420                   | 28.6661                  | 13.8876                  | 23.1342                  |

**Table S12.** Weight fraction data for the ternary system composed of [C<sub>1</sub>mim]Cl (1) + PPG-400 (2) + H<sub>2</sub>O (3) at 298 K.

| <b>100 w<sub>1</sub></b> | <b>100 w<sub>2</sub></b> | <b>100 w<sub>1</sub></b> | <b>100 w<sub>2</sub></b> | <b>100 w<sub>1</sub></b> | <b>100 w<sub>2</sub></b> |
|--------------------------|--------------------------|--------------------------|--------------------------|--------------------------|--------------------------|
| 2.2870                   | 77.0744                  | 6.5235                   | 37.3229                  | 10.1519                  | 25.4511                  |
| 2.5764                   | 64.7961                  | 6.8406                   | 35.8209                  | 10.3755                  | 23.9962                  |
| 2.7814                   | 61.0264                  | 6.8569                   | 34.5454                  | 10.9299                  | 23.3812                  |
| 3.6224                   | 58.4731                  | 7.2437                   | 33.7034                  | 11.5024                  | 22.5591                  |
| 4.2536                   | 53.7460                  | 7.5082                   | 32.4968                  | 11.9507                  | 21.7803                  |
| 4.8198                   | 49.6722                  | 7.8462                   | 31.4156                  | 12.0261                  | 21.2636                  |
| 5.8368                   | 44.5633                  | 7.9481                   | 29.9725                  | 12.5001                  | 20.8416                  |
| 6.0546                   | 41.4992                  | 8.5411                   | 28.7173                  | 13.0505                  | 19.8588                  |
| 6.3681                   | 39.6300                  | 9.4584                   | 27.3991                  | 13.4060                  | 19.1924                  |
|                          |                          | 9.9253                   | 26.3048                  | 14.7147                  | 18.0672                  |

**Table S13.** Weight fraction data for the ternary system composed of [C<sub>4</sub>C<sub>1</sub>mim]Cl (1) + PPG-400 (2) + H<sub>2</sub>O (3) at 298 K.

| <b>100 w<sub>1</sub></b> | <b>100 w<sub>2</sub></b> | <b>100 w<sub>1</sub></b> | <b>100 w<sub>2</sub></b> | <b>100 w<sub>1</sub></b> | <b>100 w<sub>2</sub></b> |
|--------------------------|--------------------------|--------------------------|--------------------------|--------------------------|--------------------------|
| 10.3617                  | 65.2116                  | 16.7530                  | 43.0048                  | 20.9044                  | 30.9722                  |
| 11.0721                  | 61.9122                  | 17.5817                  | 40.9035                  | 21.1543                  | 30.8340                  |
| 12.6299                  | 57.7286                  | 17.7507                  | 39.6767                  | 22.1987                  | 28.9547                  |
| 13.1374                  | 55.1461                  | 18.3321                  | 37.9902                  | 23.7103                  | 26.0457                  |
| 14.1187                  | 52.1039                  | 18.9275                  | 36.3712                  | 24.5947                  | 24.6326                  |
| 15.3065                  | 48.9932                  | 19.0678                  | 35.3078                  | 25.6347                  | 23.1819                  |
| 15.6519                  | 47.0885                  | 19.6013                  | 33.8955                  | 27.4748                  | 21.0591                  |
| 16.5065                  | 44.6142                  | 19.9493                  | 32.6698                  | 29.0929                  | 19.2617                  |

**Table S14.** Weight fraction data for the ternary system composed of [C<sub>4</sub>mim]Cl (1) + PPG-400 (2) + H<sub>2</sub>O (3) at 308 K.

| <b>100 w<sub>1</sub></b> | <b>100 w<sub>2</sub></b> | <b>100 w<sub>1</sub></b> | <b>100 w<sub>2</sub></b> | <b>100 w<sub>1</sub></b> | <b>100 w<sub>2</sub></b> |
|--------------------------|--------------------------|--------------------------|--------------------------|--------------------------|--------------------------|
| 8.4133                   | 70.3069                  | 12.3050                  | 56.8439                  | 17.4767                  | 33.1260                  |
| 10.0107                  | 66.2199                  | 13.0675                  | 54.6399                  | 18.0312                  | 31.9094                  |
| 11.2769                  | 61.4612                  | 14.1617                  | 50.7612                  | 26.4974                  | 19.6356                  |
| 11.9521                  | 58.8632                  | 15.2366                  | 43.0235                  | 29.1944                  | 17.9355                  |
|                          |                          | 16.1774                  | 39.5830                  | 32.1065                  | 16.2354                  |

**Table S15.** Weight fraction data for the ternary system composed of [C<sub>4</sub>mim]Cl (1) + PPG-400 (2) + H<sub>2</sub>O (3) at 318 K.

| <b>100 w<sub>1</sub></b> | <b>100 w<sub>2</sub></b> | <b>100 w<sub>1</sub></b> | <b>100 w<sub>2</sub></b> | <b>100 w<sub>1</sub></b> | <b>100 w<sub>2</sub></b> |
|--------------------------|--------------------------|--------------------------|--------------------------|--------------------------|--------------------------|
| 6.8795                   | 46.5876                  | 15.5828                  | 20.7050                  | 20.5813                  | 17.7105                  |
| 8.2630                   | 40.0229                  | 16.6243                  | 19.6602                  | 21.9831                  | 15.5914                  |
| 13.4511                  | 23.6349                  | 17.9937                  | 19.0369                  | 23.7098                  | 16.3564                  |
|                          |                          |                          |                          | 24.5321                  | 15.3819                  |

**Table S16.** Weight fraction data for the ternary system composed of [C<sub>4</sub>mim][DMP] (1) + PPG-400 (2) + H<sub>2</sub>O (3) at 308 K.

| <b>100 w<sub>1</sub></b> | <b>100 w<sub>2</sub></b> | <b>100 w<sub>1</sub></b> | <b>100 w<sub>2</sub></b> | <b>100 w<sub>1</sub></b> | <b>100 w<sub>2</sub></b> |
|--------------------------|--------------------------|--------------------------|--------------------------|--------------------------|--------------------------|
| 6.2640                   | 53.3236                  | 9.3281                   | 37.1516                  | 11.6270                  | 25.5316                  |
| 6.8673                   | 50.2882                  | 9.7034                   | 32.9047                  | 16.3506                  | 19.0918                  |
| 7.9744                   | 41.3542                  | 10.6048                  | 28.9044                  | 17.0877                  | 18.0965                  |
|                          |                          |                          |                          | 18.6435                  | 17.3644                  |

**Table S17.** Weight fraction data for the ternary system composed of [C<sub>4</sub>mim][DMP] (1) + PPG-400 (2) + H<sub>2</sub>O (3) at 318 K.

| <b>100 w<sub>1</sub></b> | <b>100 w<sub>2</sub></b> | <b>100 w<sub>1</sub></b> | <b>100 w<sub>2</sub></b> | <b>100 w<sub>1</sub></b> | <b>100 w<sub>2</sub></b> |
|--------------------------|--------------------------|--------------------------|--------------------------|--------------------------|--------------------------|
| 2.1400                   | 37.1393                  | 5.6501                   | 20.4671                  | 10.6766                  | 14.5864                  |
| 2.8856                   | 33.2219                  | 6.8869                   | 18.7174                  | 11.1584                  | 13.7336                  |
| 3.1565                   | 32.0182                  | 7.9178                   | 17.7500                  | 12.0984                  | 13.3520                  |
| 3.6611                   | 26.6355                  | 8.5711                   | 16.2025                  | 12.7917                  | 12.7951                  |
| 5.3036                   | 22.4894                  | 9.4147                   | 15.4293                  | 13.8518                  | 11.9152                  |
|                          |                          |                          |                          | 14.9287                  | 11.1941                  |



**Table S18.** Weight fraction data for the ternary system composed of [C<sub>4</sub>mim]Br (1) + PPG-400 (2) + H<sub>2</sub>O (3) at 308 K.

| 100 $w_1$ | 100 $w_2$ | 100 $w_1$ | 100 $w_2$ | 100 $w_1$ | 100 $w_2$ |
|-----------|-----------|-----------|-----------|-----------|-----------|
| 40.2507   | 44.7368   | 45.2010   | 34.2939   | 55.0013   | 19.1618   |
| 40.5276   | 44.2138   | 45.3755   | 33.8543   | 55.6026   | 18.6497   |
| 40.8294   | 43.5005   | 45.7136   | 33.3533   | 56.2999   | 17.9220   |
| 40.9077   | 43.0224   | 45.8040   | 32.7848   | 57.1246   | 17.1635   |
| 41.2090   | 42.3870   | 46.2639   | 31.9115   | 57.9419   | 16.4574   |
| 41.4642   | 41.7368   | 47.0627   | 30.7388   | 58.4199   | 15.9097   |
| 41.9290   | 40.9122   | 47.5272   | 29.7629   | 59.8535   | 14.9267   |
| 42.1086   | 40.4835   | 48.0783   | 29.0065   | 60.7187   | 14.0509   |
| 42.3995   | 39.9543   | 48.6144   | 27.9798   | 61.3659   | 13.5502   |
| 42.6562   | 39.4510   | 49.3610   | 27.1442   | 62.4133   | 12.8211   |
| 42.9080   | 38.8331   | 49.9882   | 25.8202   | 63.6848   | 12.0040   |
| 43.2366   | 38.2063   | 50.5664   | 24.9448   | 65.4736   | 10.9228   |
| 43.4152   | 37.6964   | 51.0472   | 24.3467   | 66.4051   | 10.3442   |
| 43.8304   | 36.9841   | 51.5696   | 23.2434   | 67.6630   | 9.6086    |
| 44.0839   | 36.4628   | 52.3516   | 22.1003   | 69.7446   | 8.4666    |
| 44.3034   | 35.9372   | 52.9353   | 21.3512   |           |           |
| 44.5308   | 35.3381   | 53.6730   | 20.6487   |           |           |
| 44.9494   | 34.8007   | 54.3192   | 19.8917   |           |           |

**Table S19.** Weight fraction data for the ternary system composed of [C<sub>4</sub>mim]Br (1) + PPG-400 (2) + H<sub>2</sub>O (3) at 318 K.

| 100 $w_1$ | 100 $w_2$ | 100 $w_1$ | 100 $w_2$ | 100 $w_1$ | 100 $w_2$ |
|-----------|-----------|-----------|-----------|-----------|-----------|
| 34.5126   | 51.9991   | 40.2952   | 37.8393   | 44.7197   | 28.0376   |
| 35.3453   | 49.6785   | 40.5483   | 37.1546   | 45.5822   | 26.5338   |
| 35.9572   | 48.4818   | 40.7850   | 36.5587   | 46.2592   | 25.7114   |
| 36.1012   | 47.5934   | 41.0351   | 35.8725   | 46.7435   | 24.8251   |
| 36.5680   | 46.4395   | 41.1449   | 35.2184   | 47.6754   | 23.9713   |
| 37.2848   | 45.1605   | 41.4468   | 34.6746   | 49.0943   | 22.1405   |
| 37.6951   | 44.3024   | 41.8004   | 34.0708   | 50.1600   | 21.0647   |
| 38.1008   | 43.4495   | 42.1054   | 33.6061   | 52.0212   | 19.2212   |
| 38.4683   | 42.6267   | 42.3385   | 33.0099   | 54.0512   | 17.4241   |
| 38.7213   | 41.8058   | 42.7258   | 32.3539   | 56.4736   | 15.5355   |
| 39.0117   | 40.9845   | 43.0955   | 31.5795   | 58.0958   | 14.2471   |
| 39.2946   | 40.1825   | 43.2898   | 30.7011   | 60.6836   | 12.4612   |
| 39.7746   | 39.2940   | 43.6928   | 29.9134   | 64.7707   | 10.1317   |
| 40.0174   | 38.4765   | 44.3354   | 28.7276   |           |           |

**Table S20.** Weight fraction data for the type “0” ternary system composed of [C<sub>4</sub>mim][DMP] (1) + PPG-400 (2) + H<sub>2</sub>O (3) at 298 K.

| 100 $w_1$ | 100 $w_2$ | 100 $w_1$ | 100 $w_2$ | 100 $w_1$ | 100 $w_2$ |
|-----------|-----------|-----------|-----------|-----------|-----------|
| 10.2845   | 53.9655   | 19.8879   | 24.7167   | 31.1576   | 11.3927   |
| 11.1897   | 51.4337   | 20.1419   | 22.5531   | 31.4702   | 10.9483   |
| 12.2209   | 49.0403   | 20.1436   | 24.1568   | 31.9995   | 10.4934   |
| 12.8246   | 45.6668   | 20.1546   | 23.2696   | 32.6803   | 10.0654   |
| 12.9927   | 42.7625   | 21.0680   | 20.5721   | 33.1822   | 9.6921    |
| 13.5494   | 41.3147   | 21.9197   | 18.9082   | 34.1901   | 9.4067    |
| 14.2539   | 39.7814   | 23.1715   | 17.7588   | 34.7591   | 8.9183    |
| 14.5503   | 37.4066   | 24.0793   | 16.7404   | 26.0137   | 58.7519   |
| 15.2003   | 36.1390   | 24.5616   | 15.9877   | 33.1104   | 48.9681   |
| 15.4495   | 34.2713   | 24.7843   | 15.5965   | 39.4510   | 40.3660   |
| 15.5318   | 32.5398   | 25.0339   | 15.2395   | 46.3344   | 31.6344   |
| 15.8222   | 32.4511   | 25.9842   | 14.7703   | 49.6685   | 26.5823   |
| 15.9988   | 31.5143   | 26.7041   | 14.0447   | 21.8219   | 63.4534   |
| 16.2627   | 30.8294   | 27.2756   | 13.4256   | 52.4697   | 22.5525   |
| 16.6389   | 29.8365   | 27.7989   | 12.7640   | 17.6481   | 69.1330   |
| 17.1679   | 28.2670   | 28.6502   | 12.4029   | 9.7423    | 80.7801   |
| 17.2236   | 28.4871   | 29.7317   | 11.8288   | 59.1030   | 15.1077   |
|           |           |           |           | 65.0544   | 7.3398    |

**Table S21.** Weight fraction data for the type “0” ternary system composed of [C<sub>4</sub>mim][CH<sub>3</sub>SO<sub>4</sub>] (1) + PPG-400 (2) + H<sub>2</sub>O (3) at 298 K.

| 100 $w_1$ | 100 $w_2$ | 100 $w_1$ | 100 $w_2$ | 100 $w_1$ | 100 $w_2$ |
|-----------|-----------|-----------|-----------|-----------|-----------|
| 29.5744   | 60.5351   | 42.4439   | 36.7763   | 53.7214   | 22.8816   |
| 33.5567   | 51.8000   | 43.0643   | 36.3194   | 55.3654   | 21.5361   |
| 35.5414   | 48.7008   | 44.5817   | 34.2612   | 57.8163   | 19.3291   |
| 37.1827   | 45.8045   | 45.6420   | 32.6491   | 54.9611   | 37.0314   |
| 38.4546   | 43.4830   | 46.8258   | 30.8970   | 47.2997   | 44.9170   |
| 39.2612   | 41.8435   | 48.2825   | 29.1087   | 37.3568   | 55.6172   |
| 40.5496   | 39.7397   | 49.6467   | 27.4962   | 27.9542   | 64.9742   |
| 41.1632   | 38.6289   | 51.1430   | 25.9716   | 61.9441   | 28.3965   |
| 41.9679   | 38.2424   | 51.8636   | 24.9294   |           |           |

**Table S22.** Weight fraction data for the type “0” ternary system composed of [C<sub>4</sub>mim][CH<sub>3</sub>CO<sub>2</sub>] (1) + PPG-400 (2) + H<sub>2</sub>O (3) at 298 K.

| 100 $w_1$ | 100 $w_2$ | 100 $w_1$ | 100 $w_2$ | 100 $w_1$ | 100 $w_2$ |
|-----------|-----------|-----------|-----------|-----------|-----------|
| 6.3384    | 76.5586   | 16.1015   | 36.3097   | 30.8244   | 15.3771   |
| 7.2369    | 71.2274   | 16.3154   | 35.5050   | 31.7780   | 14.7948   |
| 7.8568    | 68.5571   | 17.0030   | 34.5393   | 33.7944   | 13.8589   |
| 8.7020    | 65.6834   | 17.0775   | 33.5254   | 34.4047   | 13.4102   |
| 9.4700    | 63.0880   | 17.7353   | 32.6047   | 35.0071   | 12.7958   |
| 10.0212   | 60.6780   | 21.8148   | 26.9760   | 35.9113   | 12.0804   |
| 10.6133   | 58.3684   | 22.2073   | 25.4883   | 37.5273   | 11.2540   |
| 11.2064   | 56.3302   | 22.4303   | 24.8099   | 13.4882   | 72.7198   |
| 11.7436   | 54.5732   | 23.2998   | 23.1970   | 21.3781   | 61.8883   |
| 12.2747   | 52.7037   | 23.9262   | 22.3697   | 28.0865   | 51.2096   |
| 12.8804   | 51.0111   | 24.4446   | 21.5937   | 34.8634   | 42.9439   |
| 13.0559   | 48.5956   | 25.2643   | 20.7338   | 41.0134   | 34.1006   |
| 13.5117   | 47.1960   | 25.9194   | 19.9175   | 9.2190    | 77.3599   |
| 13.9173   | 45.8974   | 26.7152   | 19.1814   | 44.5488   | 29.8459   |
| 14.2504   | 44.6298   | 27.2733   | 18.6724   | 47.9925   | 25.8443   |
| 14.5439   | 43.4994   | 27.7917   | 18.0921   | 51.3698   | 22.1771   |
| 14.9050   | 42.2438   | 28.3628   | 17.5193   | 54.0590   | 18.6915   |
| 15.5014   | 41.1022   | 29.0070   | 16.9879   | 56.2696   | 14.6132   |
| 15.1877   | 40.1484   | 29.6159   | 16.4441   |           |           |
| 15.8638   | 39.2097   | 30.1347   | 15.9265   |           |           |

**Table S23.** Partition coefficients ( $K$ ) of chloranilic acid and mixture compositions of the systems composed of ILs + PPG-400 + H<sub>2</sub>O at 298 K.

| Ionic Liquid                                           | Weight fraction composition in feed / |        | TLL   | $K$   |
|--------------------------------------------------------|---------------------------------------|--------|-------|-------|
|                                                        | wt%                                   |        |       |       |
|                                                        | PPG                                   | IL     |       |       |
| [C <sub>1</sub> mim]Cl                                 | 54.239                                | 13.729 | 88.63 | 0.031 |
| [C <sub>2</sub> mim]Cl                                 | 54.889                                | 13.884 | 96.36 | 0.063 |
| [C <sub>3</sub> mim]Cl                                 | 55.181                                | 14.482 | 91.63 | 0.102 |
| [C <sub>4</sub> mim]Cl                                 | 54.974                                | 19.779 | 85.68 | 0.631 |
| [C <sub>4</sub> mim][CH <sub>3</sub> SO <sub>4</sub> ] | 53.107                                | 39.865 | 82.54 | 1.176 |
| [C <sub>4</sub> mim]Br                                 | 53.957                                | 35.863 | 98.48 | 1.071 |
| [Ch]Cl                                                 | 55.053                                | 15.059 | 91.17 | 0.014 |
| [C <sub>4</sub> mpyr]Cl                                | 54.829                                | 15.099 | 92.41 | 0.152 |
| [C <sub>4</sub> mpy]Cl                                 | 55.136                                | 19.72  | 90.56 | 0.499 |

**Table S25.** pH and conductivity values of the top (PPG-rich) and bottom (IL-rich) phases in ABS composed of PPG-400 + IL at 298 K acidified with HCL 6M to carry out the chloroanilic acid partition studies.

| Ionic Liquid                                           | Top Phase |                                          | Bottom Phase |                                          |
|--------------------------------------------------------|-----------|------------------------------------------|--------------|------------------------------------------|
|                                                        | pH        | Conductivity /<br>(ms.cm <sup>-1</sup> ) | pH           | Conductivity /<br>(ms.cm <sup>-1</sup> ) |
| [C <sub>4</sub> mim]Cl                                 | 0.76      | 0.26                                     | 0.68         | 11.3                                     |
| [C <sub>4</sub> mim]Br                                 | 0.62      | 2.03                                     | 0.68         | 6.4                                      |
| [C <sub>4</sub> mim][DMP]                              | 1.14      | 0.26                                     | 1.29         | 2.8                                      |
| [C <sub>4</sub> mim][CH <sub>3</sub> SO <sub>4</sub> ] | 0.70      | 0.20                                     | 0.77         | 1.9                                      |
| [C <sub>1</sub> mim]Cl                                 | 0.89      | 0.10                                     | 0.55         | 43.4                                     |
| [C <sub>2</sub> mim]Cl                                 | 0.99      | 0.18                                     | 0.57         | 25.9                                     |
| [C <sub>3</sub> mim]Cl                                 | 0.98      | 0.18                                     | 0.65         | 14.9                                     |
| [C <sub>4</sub> mpy]Cl                                 | 0.89      | 0.27                                     | 0.69         | 13.3                                     |
| [C <sub>4</sub> mpyr]Cl                                | 0.87      | 0.25                                     | 0.64         | 17.2                                     |
| [Ch]Cl                                                 | 1.07      | 0.01                                     | 0.44         | 28.3                                     |

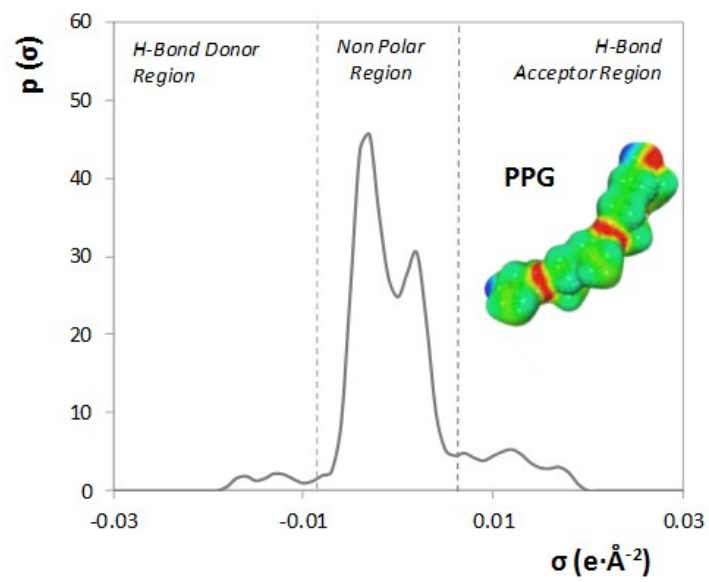

**Fig. S1.**  $\sigma$ -profile representation of 5 monomers of PPG-400.
